# Supplementary material for: Evaluation of the Hydrophilic/Hydrophobic Balance of 13X Zeolite by Adsorption of Water, Methanol, and Cyclohexane as Pure Vapors or as Mixtures
Source: MDPI journal article supplement (doi:10.3390/nano14020213), 2024-01-18
Supplement: s1 [file s1]

Evaluation of the Hydrophilic/Hydrophobic Balance of 13X Zeolite by Adsorption of Water, Methanol, and Cyclohexane as Pure Vapors or as Mixtures

Meryem Saidi <sup>1</sup>, François Bihl <sup>2</sup>, Olinda Gimello <sup>1</sup>, Benoit Louis <sup>2</sup>, Anne-Cécile Roger <sup>2</sup>, Philippe Trens <sup>1</sup> and Fabrice Salles <sup>1,\*</sup>

<sup>a</sup> ICGM, Univ Montpellier, CNRS, ENSCM, Montpellier, France

<sup>b</sup> ICPEES, Univ Strasbourg, CNRS, ECPM, Strasbourg, France

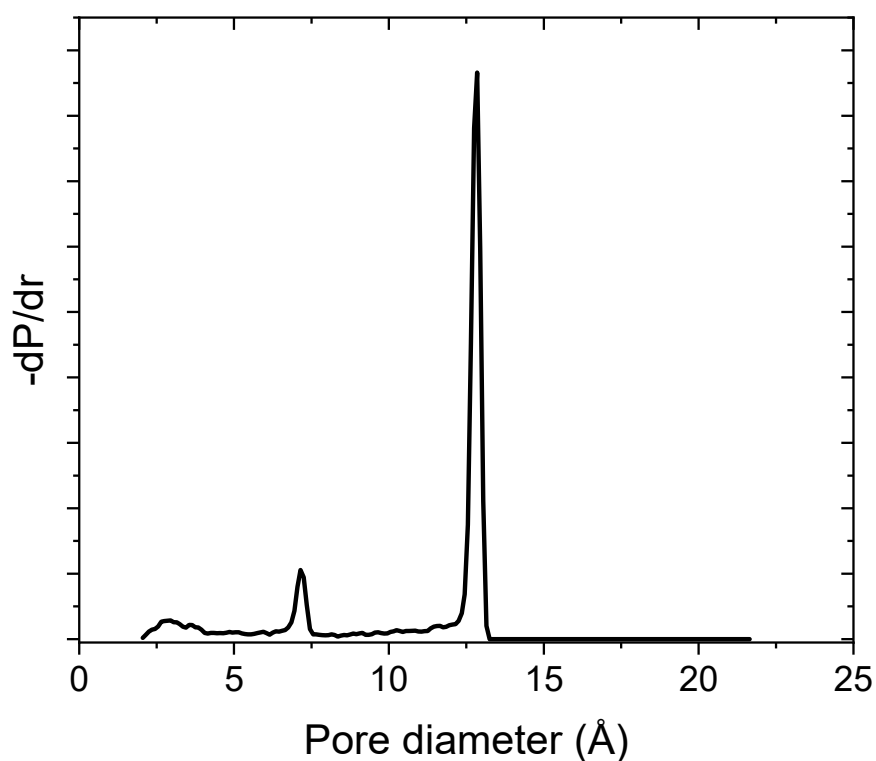

Figure S1. Pore size distribution obtained from the crystal structure using the methodology developed by Gelb and Gubbins (Gelb, L. D.; Gubbins, K. E. Pore Size Distributions in Porous Glasses: A Computer Simulation Study. *Langmuir* **1999**, *15*, 305– 308, DOI: 10.1021/la980841865).

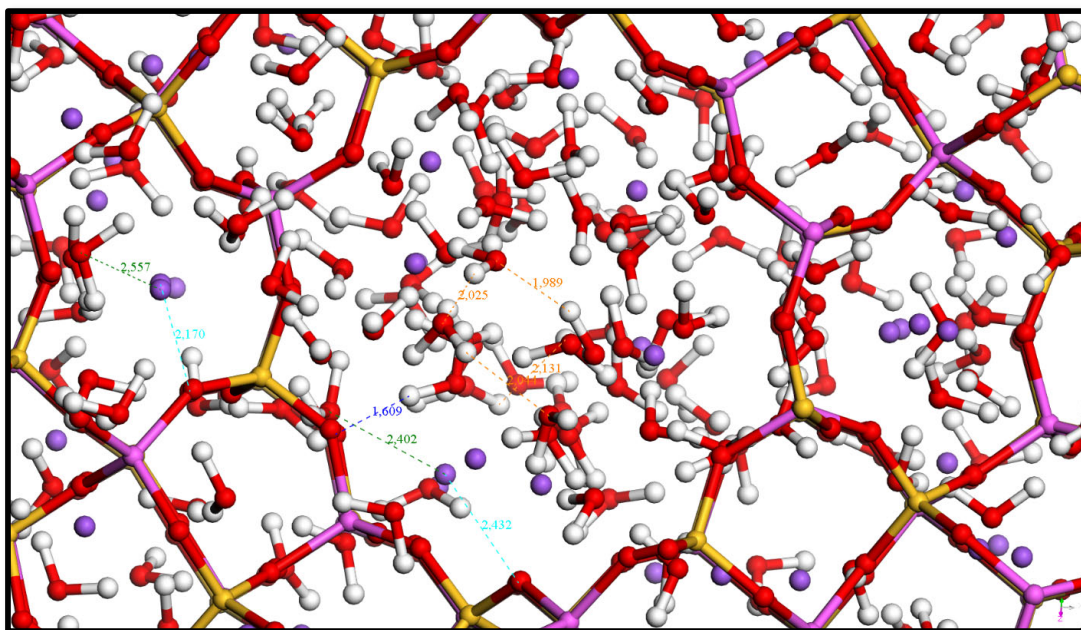

(a)

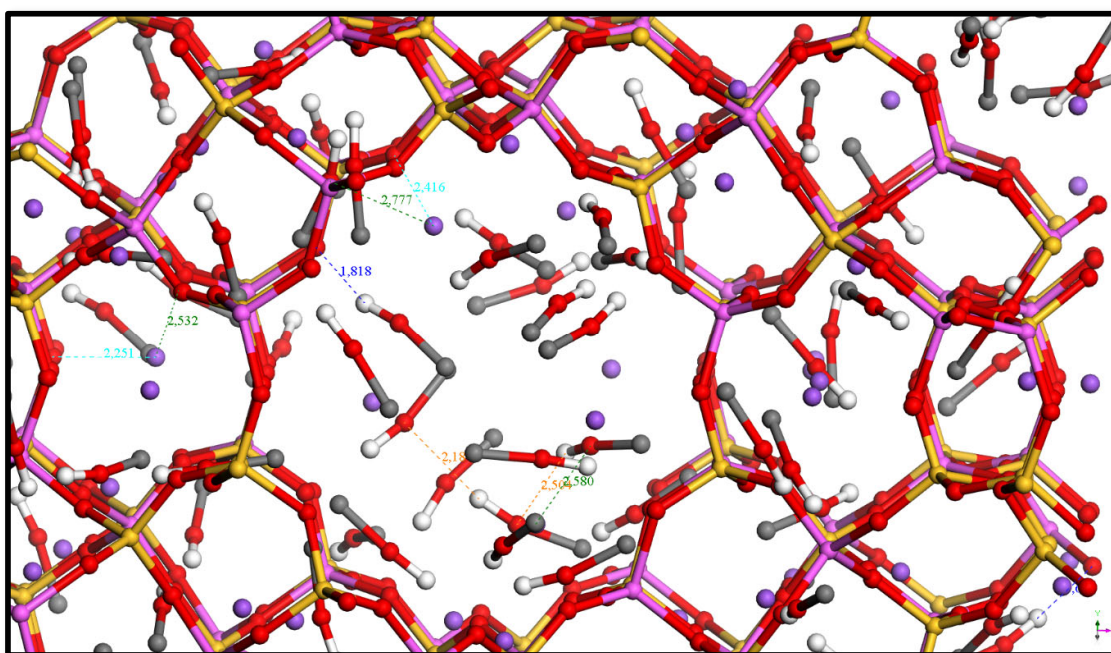

(b)

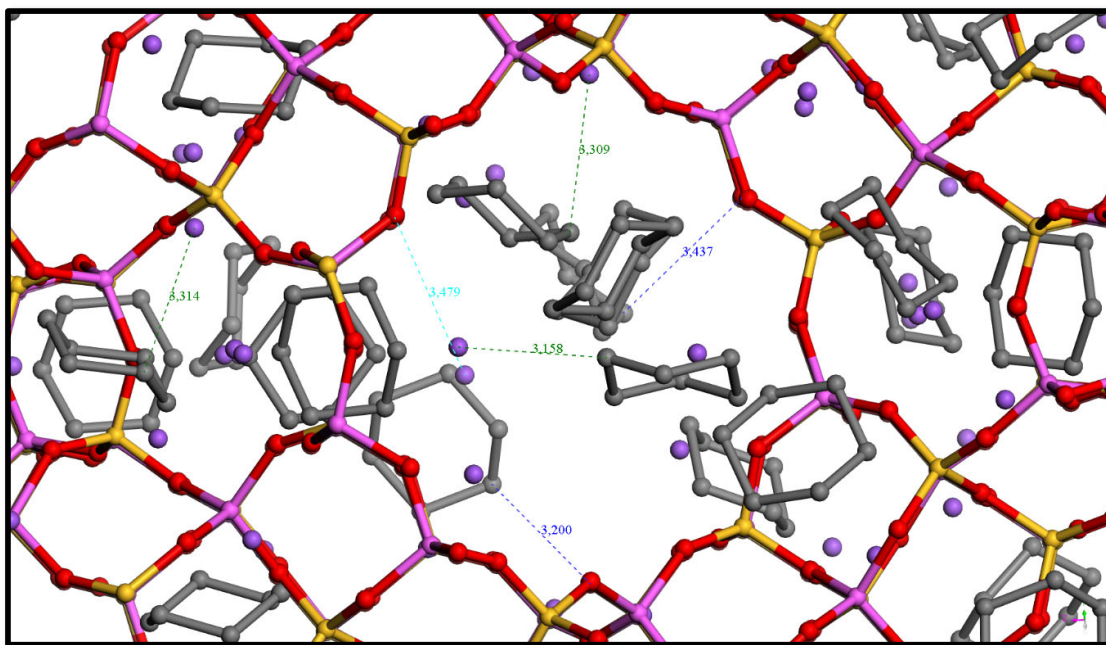

(c)

Figure S2. Snapshots obtained at the saturation of the simulated sorption isotherms at 25°C in the case of (a) water sorption; (b) methanol sorption; (c) cyclohexane sorption.
